# Supplementary material for: Violence, runaway, and suicide attempts among people living with schizophrenia in China: Prevalence and correlates
Source: PeerJ. 2022 Mar 1;10:e13033. doi: 10.7717/peerj.13033 (PMC8896021; doi:10.7717/peerj.13033)
Supplement: Supplemental Information 1 [file peerj-10-13033-s001.xlsx]

## Sheet: Sheet1
age	sex	marriage1	education1	work1	inhospital	drugadh	tdiasbility	tphq	phqcat2	tgad	gadcat2	BST	BS1	BS2	BS3	BS4	BS5	GAF
52	female	divorced/separated/widowed	middle and high	unemplyed	no	fully adherent	40	14	1	13	1	51	11	11	10	7	12	50
64	female	married/cohabited	primary and below	unemplyed	no	fully adherent	17	3	0	0	0	76	7	19	23	9	18	30
53	male	married/cohabited	primary and below	unemplyed	yes	fully adherent	56	10	1	7	0	60	13	12	12	10	13	50
42	male	married/cohabited	middle and high	unemplyed	no	fully adherent	51	14	1	0	0	61	8	19	14	10	10	30
63	male	married/cohabited	middle and high	unemplyed	no	fully adherent	20	4	0	3	0	39	11	10	8	4	6	30
35	female	married/cohabited	middle and high	unemplyed	no	fully adherent	14	0	0	0	0	28	7	5	6	5	5	70
34	female	single	middle and high	emplyed	no	fully adherent	18	6	0	2	0	32	14	4	4	5	5	60
50	male	married/cohabited	middle and high	unemplyed	no	fully adherent	29	24	1	13	1	51	15	7	10	11	8	50
28	male	single	middle and high	emplyed	no	fully adherent	30	16	1	9	0	41	11	7	10	6	7	70
43	male	single	middle and high	unemplyed	no	fully adherent	38	6	0	0	0	35	5	12	8	4	6	50
32	female	single	college and above	emplyed	no	fully adherent	12	0	0	0	0	20	5	5	4	3	3	80
63	female	married/cohabited	primary and below	unemplyed	no	fully adherent	46	6	0	0	0	63	6	15	16	11	15	20
45	female	married/cohabited	middle and high	unemplyed	no	fully adherent	16	0	0	0	0	48	9	8	13	10	8	60
62	male	married/cohabited	middle and high	unemplyed	no	fully adherent	19	12	1	3	0	43	13	13	10	4	3	70
43	female	married/cohabited	primary and below	unemplyed	yes	fully adherent	21	0	0	9	0	34	11	7	6	5	5	80
52	male	married/cohabited	middle and high	unemplyed	no	fully adherent	16	4	0	1	0	41	8	8	13	8	4	60
34	female	married/cohabited	college and above	unemplyed	no	not fully adherent	34	25	1	18	1	58	8	12	13	10	15	50
40	female	married/cohabited	middle and high	emplyed	no	fully adherent	27	15	1	16	1	51	23	10	9	6	3	50
52	male	married/cohabited	middle and high	emplyed	no	fully adherent	16	3	0	1	0	21	6	5	4	3	3	80
47	male	married/cohabited	primary and below	unemplyed	no	fully adherent	16	0	0	0	0	21	4	5	5	4	3
37	female	married/cohabited	middle and high	unemplyed	no	fully adherent	27	6	0	4	0	29	8	11	4	3	3	60
53	male	divorced/separated/widowed	middle and high	unemplyed	no	fully adherent	21	12	1	12	1	29	10	7	5	4	3	80
47	male	married/cohabited	middle and high	unemplyed								54	12	16	10	9	7	60
29	female	married/cohabited	middle and high	unemplyed								43	5	17	8	3	10	50
37	male	single	middle and high	unemplyed	no	fully adherent	28	12	1	13	1	52	12	13	10	9	8	50
66	male	married/cohabited	primary and below	unemplyed	no	fully adherent	23	1	0	3	0	33	10	13	4	3	3	60
44	female	married/cohabited	primary and below	unemplyed	no	fully adherent	25	8	0	2	0	44	15	13	7	3	6	50
30	female	married/cohabited	middle and high	unemplyed	no	fully adherent	42	24	1	21	1	44	7	15	10	6	6	40
37	female	married/cohabited	middle and high	unemplyed	yes	fully adherent	21	3	0	1	0	31	12	6	4	6	3	80
42	male	single	primary and below	unemplyed	no	fully adherent	39	19	1	0	0	31	4	15	4	3	5	60
32	female	married/cohabited	primary and below	unemplyed	no	fully adherent	48	13	1	6	0	33	4	18	0	5	6	30
26	female	married/cohabited	middle and high	unemplyed	no	fully adherent	37	22	1	21	1	37	13	11	4	3	6	60
40	male	single	primary and below	unemplyed	no	fully adherent	20	16	1	15	1	50	13	9	13	6	9	50
49	female	married/cohabited	primary and below	unemplyed	yes	fully adherent	26	15	1	12	1	27	8	7	4	5	3	80
32	female	married/cohabited	middle and high	unemplyed	no	fully adherent	12	3	0	4	0	34	13	4	6	7	4	60
45	female	married/cohabited	primary and below	unemplyed	yes	fully adherent	38	2	0	1	0	49	4	19	8	6	12	40
44	female	married/cohabited	middle and high	unemplyed	no	fully adherent	24	1	0	4	0	37	14	8	4	8	3	80
32	female	married/cohabited	primary and below	unemplyed	no	fully adherent	23	0	0	0	0	23	4	9	4	3	3	70
56	male	married/cohabited	middle and high	unemplyed	no	fully adherent	13	1	0	0	0	22	4	6	4	5	3	80
45	female	married/cohabited	middle and high	unemplyed	no	fully adherent	34	3	0	7	0	43	8	11	11	5	8	60
51	female	married/cohabited	middle and high	unemplyed	no	fully adherent	18	1	0	0	0	34	6	7	9	5	7	70
44	female	married/cohabited	primary and below	unemplyed	no	not fully adherent	22	13	1	4	0	45	5	15	12	7	6	40
42	female	divorced/separated/widowed	middle and high	unemplyed	no	fully adherent	21	0	0	0	0
56	female	single	middle and high	unemplyed	no	fully adherent	12	2	0	2	0	37	10	6	10	4	7	70
37	female	married/cohabited	middle and high	unemplyed	no	fully adherent	13	2	0	0	0	23	5	4	6	3	5	80
30	male	married/cohabited	middle and high	unemplyed	no	fully adherent	14	1	0	0	0
34	male	single	middle and high	unemplyed	no		33	1	0	14	1	34	4	16	4	7	3	40
42	female	divorced/separated/widowed	middle and high	unemplyed	no	fully adherent	42	19	1	8	0
77	female	divorced/separated/widowed	middle and high	unemplyed	no	fully adherent	29	20	1	12	1	36	7	10	8	3	8	60
51	male	married/cohabited	college and above	unemplyed	no	fully adherent	32	9	0	21	1
66	male	single	middle and high	unemplyed	no	fully adherent	31	13	1	13	1	54	10	13	13	8	10	50
61	female	divorced/separated/widowed	middle and high	unemplyed	no	fully adherent	33	5	0	1	0	39	8	10	10	4	7	60
54	female	married/cohabited	middle and high	unemplyed	no	fully adherent	21	0	0	0	0	32	5	14	4	3	6	60
51	male	single	primary and below	unemplyed	no	fully adherent	24	13	1	10	1
56	male	married/cohabited	primary and below	unemplyed	yes		27	3	0	14	1	31	8	8	4	5	6	60
55	female	single	middle and high	unemplyed	no	fully adherent	22	9	0	8	0
51	male	single	middle and high	unemplyed	no	fully adherent	39	0	0	0	0	49	8	13	13	6	9	50
44	male	single	middle and high	unemplyed	no	fully adherent	50	5	0	0	0
33	female	single	middle and high	unemplyed	no	fully adherent	31	16	1	7	0
42	male	single	middle and high	unemplyed	no	fully adherent	25	24	1	19	1	40	4	12	4	5	15	50
28	male	single	middle and high	unemplyed	no	fully adherent	16	7	0	4	0	35	6	10	9	3	7	60
29	male	single	middle and high	unemplyed	no	fully adherent	14	6	0	1	0	27	4	11	4	3	5	80
61	male	single	middle and high	unemplyed	no	fully adherent	36	13	1	10	1	50	11	8	13	9	9	50
43	male	single	college and above	unemplyed	no	fully adherent	13	0	0	0	0	26	4	10	4	5	3	60
44	male	married/cohabited	middle and high	unemplyed	no	fully adherent	21	3	0	7	0	37	11	6	5	5	10	60
71	female	married/cohabited	middle and high	unemplyed	no	fully adherent	28	3	0	6	0	24	7	7	4	3	3	80
52	female	divorced/separated/widowed	college and above	unemplyed	no	fully adherent	14	7	0	0	0	29	8	11	4	3	3	70
67	female	married/cohabited	middle and high	unemplyed	no	fully adherent	37	17	1	13	1	52	14	9	14	5	10	50
42	male	single	middle and high	unemplyed	no	fully adherent	32	20	1	13	1	40	11	13	10	3	3	40
51	female	divorced/separated/widowed	middle and high	unemplyed	no	fully adherent	13	0	0	0	0	23	4	6	6	4	3	80
56	male	divorced/separated/widowed	college and above	unemplyed	no	fully adherent	17	0	0	6	0	33	11	8	4	5	5	70
38	male	single	middle and high	unemplyed	no	fully adherent	12	9	0	7	0	25	5	10	4	3	3	80
33	male	single	middle and high	unemplyed	yes		25	5	0	1	0	31	6	7	8	3	7	60
37	male	divorced/separated/widowed	middle and high	unemplyed	no	fully adherent	39	22	1	14	1	36	7	11	7	5	6	60
38	female	single	college and above	unemplyed	no	not fully adherent	31	17	1	13	1	33	10	7	7	3	6	60
44	male	single	middle and high	unemplyed	no	not fully adherent
53	female	single	middle and high	unemplyed	no	fully adherent	40	18	1	10	1	51	12	11	15	8	5	50
38	male	single	middle and high	unemplyed	no	fully adherent	26	9	0	7	0	20	6	4	4	3	3	80
37	female	divorced/separated/widowed	middle and high	unemplyed	no	fully adherent	40	2	0	2	0
40	male	single	primary and below	unemplyed	no	fully adherent	21	15	1	5	0	21	6	5	4	3	3	70
45	female	married/cohabited	middle and high	unemplyed	no	fully adherent	15	9	0	7	0	31	12	4	5	4	6	70
36	male	single	middle and high	unemplyed	no	not fully adherent	21	6	0	7	0	38	12	7	7	6	6	60
44	female	married/cohabited	middle and high	unemplyed	no	fully adherent	18	0	0	0	0	18	4	5	4	2	3	60
54	female	divorced/separated/widowed	middle and high	unemplyed	no	fully adherent	17	12	1	13	1	30	10	6	6	3	5	60
38	female	divorced/separated/widowed	middle and high	emplyed	no	fully adherent	12	3	0	0	0	24	8	4	6	3	3	80
32	male	single	primary and below	unemplyed	no	fully adherent	27	8	0	6	0	30	7	6	8	3	6	60
58	male	married/cohabited	middle and high	unemplyed	no	fully adherent	31	5	0	0	0	25	9	5	4	4	3	80
56	male	divorced/separated/widowed	middle and high	emplyed	no	fully adherent	13	1	0	0	0	19	4	5	4	3	3	60
51	female	married/cohabited	middle and high	unemplyed	no	fully adherent	30	12	1	10	1	33	12	8	5	4	4	70
46	female	divorced/separated/widowed	middle and high	unemplyed	no	fully adherent	16	0	0	0	0	22	5	7	4	3	3	70
52	male	married/cohabited	middle and high	unemplyed	no	fully adherent	14	18	1	14	1	24	7	5	6	3	3	80
55	female	married/cohabited	middle and high	unemplyed	no	fully adherent	26	22	1	14	1	44	10	8	11	7	8	60
71	female	divorced/separated/widowed	middle and high	unemplyed	no	fully adherent	33	6	0	4	0	42	11	8	9	7	7	70
56	male	married/cohabited	primary and below	unemplyed	no	fully adherent	34	1	0	1	0	38	6	7	13	7	5	60
47	male	single	middle and high	unemplyed	no	fully adherent	21	15	1	14	1	32	13	6	5	5	3	60
50	male	divorced/separated/widowed	middle and high	unemplyed	no	not fully adherent	45	2	0	21	1	84	20	10	24	15	15	50
45	female	single	college and above	unemplyed	no	fully adherent	36	15	1	9	0
51	male	divorced/separated/widowed	middle and high	emplyed	no	fully adherent	16	2	0	2	0	27	7	8	5	4	3	70
33	male	single	college and above	unemplyed	no	fully adherent	34	11	1	6	0	39	11	7	8	7	6	70
60	male	married/cohabited	middle and high	unemplyed	no	fully adherent	30	0	0	0	0	30	4	6	11	6	3	50
67	male	married/cohabited	college and above	unemplyed	yes	fully adherent	31	21	1	19	1	68	13	9	19	14	13	60
58	female	married/cohabited	college and above	unemplyed	no	fully adherent	13	4	0	6	0	28	10	4	4	5	5	80
39	male	single	middle and high	unemplyed	no	fully adherent	36	20	1	14	1
36	female	single	middle and high	unemplyed	no	fully adherent	24	1	0	4	0	31	9	5	8	5	4	70
32	female	single	middle and high	unemplyed	no	fully adherent	19	13	1	9	0
48	male	single	college and above	unemplyed	no	fully adherent	19	9	0	7	0	39	13	7	6	8	5
49	female	divorced/separated/widowed	college and above	unemplyed	no	fully adherent	20	6	0	7	0	37	11	6	6	7	7	70
36	male	single	middle and high	unemplyed	no	fully adherent	25	11	1	7	0	35	6	15	6	3	5	60
44	male	single	middle and high	unemplyed	no	fully adherent	19	7	0	6	0	33	7	8	6	5	7	70
44	male	single	middle and high	unemplyed	no	fully adherent	33	18	1	0	0	44	4	20	4	6	10	40
44	male	divorced/separated/widowed	college and above	emplyed	no	fully adherent	27	8	0	3	0	22	6	5	4	4	3	70
49	male	single	college and above	unemplyed	no	fully adherent	24	5	0	1	0	24	6	6	6	3	3	70
50	male	single	middle and high	emplyed	no	fully adherent	18	5	0	4	0	38	12	6	8	8	4	80
40	male	single	middle and high	emplyed	no	fully adherent	24	15	1	5	0	27	8	7	5	4	3	70
45	male	single	middle and high	emplyed	no	fully adherent	39	3	0	3	0	21	4	7	4	3	3	80
50	female	married/cohabited	middle and high	unemplyed	yes	fully adherent	38	22	1	14	1	38	13	9	4	6	6	70
45	male	single	college and above	unemplyed	no	fully adherent	35	13	1	12	1	26	9	6	4	4	3	70
52	female	divorced/separated/widowed	primary and below	unemplyed	no	fully adherent	45	4	0	4	0	26	9	7	4	3	3	70
30	male	single	middle and high	unemplyed	no	fully adherent	31	9	0	12	1	38	8	6	13	3	8	50
24	male	single	middle and high	unemplyed	no	fully adherent	18	7	0	7	0
43	male	married/cohabited	college and above	unemplyed	no	fully adherent	14	4	0	2	0	29	12	4	4	4	5	80
41	male	single	middle and high	emplyed	no	fully adherent	18	1	0	2	0	25	9	5	4	4	3	90
46	female	married/cohabited	middle and high	unemplyed								24	5	9	4	3	3	80
42	male	married/cohabited	middle and high	emplyed	no	fully adherent	26	13	1	8	0	40	9	11	6	7	7	70
47	male	married/cohabited	middle and high	unemplyed	no	fully adherent	19	4	0	4	0	24	5	9	4	3	3	70
59	female	married/cohabited	middle and high	unemplyed	no	fully adherent	18	7	0	2	0	36	7	11	5	6	7
31	male	single	primary and below	unemplyed	no	fully adherent	15	11	1	7	0	52	8	9	16	6	13	50
23	male	single	primary and below	unemplyed	yes	fully adherent	32	10	1	10	1	51	9	10	13	11	8	30
44	female	single	middle and high	unemplyed	no	fully adherent	38	18	1	16	1
49	male	married/cohabited	middle and high	unemplyed	no	fully adherent	33	10	1	7	0	22	6	6	4	3	3	70
60	female	married/cohabited	middle and high	unemplyed	no		14	3	0	6	0	34	12	6	6	5	5	80
30	female	married/cohabited	middle and high	emplyed	no	fully adherent	14	0	0	1	0	18	4	4	4	3	3	90
39	female	married/cohabited	middle and high	unemplyed	no	fully adherent	29	7	0	7	0	45	9	11	11	6	8	60
69	female	married/cohabited	middle and high	unemplyed	no	fully adherent	33	0	0	0	0	34	4	11	8	5	6	70
48	male	married/cohabited	middle and high	emplyed	no	fully adherent	12	2	0	0	0	19	4	5	4	3	3	80
54	female	married/cohabited	middle and high	unemplyed	no	fully adherent	38	9	0	3	0	44	8	13	12	6	5	60
43	female	married/cohabited	middle and high	unemplyed	no	not fully adherent	26	12	1	12	1
36	male	single	primary and below	unemplyed	no	fully adherent	12	0	0	2	0	43	5	14	12	7	5	40
45	male	single	middle and high	unemplyed	no	fully adherent	14	0	0	0	0	31	6	10	9	3	3	70
43	male	single	middle and high	unemplyed	no	fully adherent	42	22	1	18	1	42	8	15	5	8	6	50
43	male	single	college and above	unemplyed	no	fully adherent	34	0	0	2	0
55	male	single	college and above	unemplyed	no	fully adherent	22	8	0	5	0	25	9	5	4	4	3	80
53	female	married/cohabited	college and above	unemplyed	no	fully adherent	12	0	0	0	0	21	6	5	4	3	3
62	male	married/cohabited	primary and below	unemplyed	no	fully adherent	25	5	0	6	0	41	9	13	4	5	10	60
55	male	single	primary and below	unemplyed	no	fully adherent	46	6	0	1	0
43	male	single	college and above	unemplyed	no	fully adherent	14	0	0	0	0	19	4	5	4	3	3	70
43	male	single	college and above	emplyed	no	fully adherent	12	0	0	0	0	19	4	5	4	3	3	80
43	female	single	middle and high	unemplyed	no	fully adherent	26	23	1	16	1	31	10	6	8	4	3	60
46	male	divorced/separated/widowed	middle and high	unemplyed	no	fully adherent	40	19	1	18	1	41	12	12	7	4	6	60
48	male	married/cohabited	middle and high	unemplyed	no	fully adherent	25	17	1	20	1	35	12	6	6	3	8	60
50	female	married/cohabited	middle and high	emplyed	no	fully adherent	17	4	0	0	0	23	6	7	4	3	3	80
67	female	married/cohabited	primary and below	unemplyed	no	not fully adherent	21	27	1	21	1
35	female	single	college and above	unemplyed	yes		25	15	1	12	1	40	12	6	7	8	7	50
47	female	divorced/separated/widowed	middle and high	unemplyed	no	fully adherent	25	19	1	16	1
43	male	divorced/separated/widowed	middle and high	unemplyed	no	fully adherent	41	15	1	21	1	32	12	8	4	5	3	70
51	female	single	primary and below	unemplyed	no	fully adherent	21	0	0	0	0	21	5	6	4	3	3	70
49	female	married/cohabited	middle and high	unemplyed	no	fully adherent	17	7	0	3	0	24	6	6	6	3	3	70
49	female	single	middle and high	unemplyed	no	fully adherent	19	18	1	10	1	20	4	6	4	3	3	50
52	male	married/cohabited	middle and high	unemplyed	no	fully adherent	59	26	1	21	1	32	11	6	7	3	5	60
54	female	divorced/separated/widowed	middle and high	unemplyed	no	fully adherent	42	14	1	12	1	20	4	6	4	3	3	70
42	female	married/cohabited	middle and high	unemplyed	no	fully adherent	27	9	0	7	0	32	10	5	8	4	5	60
47	female	married/cohabited	middle and high	unemplyed	no	fully adherent	38	0	0	9	0	21	5	6	4	3	3	70
55	male	married/cohabited	middle and high	unemplyed	no	fully adherent	22	13	1	9	0	24	5	7	6	3	3	60
48	male	divorced/separated/widowed	primary and below	unemplyed	no	fully adherent	38	0	0	3	0	20	4	6	4	3	3	60
30	female	married/cohabited	middle and high	unemplyed	no	fully adherent	14	2	0	1	0	20	5	5	4	3	3	70
51	male	married/cohabited	primary and below	unemplyed	no	fully adherent	32	14	1	14	1	48	13	8	14	4	9	50
54	female	divorced/separated/widowed	primary and below	unemplyed	no	fully adherent	21	1	0	0	0	23	4	5	6	3	5	80
20	female	single	middle and high	unemplyed	no	not fully adherent	14	24	1	18	1	24	8	5	4	3	4	60
56	female	married/cohabited	middle and high	unemplyed	no	fully adherent	27	6	0	6	0	32	8	9	6	4	5	60
45	female	divorced/separated/widowed	middle and high	unemplyed	no	fully adherent	31	9	0	7	0	24	8	6	4	3	3	60
43	male	single	middle and high	unemplyed	no	fully adherent	20	20	1	20	1	30	10	7	4	4	5	70
32	male	single	middle and high	emplyed	no	fully adherent	16	0	0	0	0	19	4	5	4	3	3	70
46	male	married/cohabited	middle and high	unemplyed	no	fully adherent	15	0	0	0	0	20	4	6	4	3	3	60
28	male	single	college and above	unemplyed	no	not fully adherent	35	1	0	0	0	21	5	5	5	3	3	70
40	female	married/cohabited	primary and below	unemplyed	no	not fully adherent	18	9	0	7	0	33	13	6	7	3	4	60
32	female	married/cohabited	middle and high	unemplyed	no	fully adherent	27	11	1	7	0	22	7	5	4	3	3	60
57	female	married/cohabited	primary and below	emplyed	no	fully adherent	18	0	0	0	0	20	4	6	4	3	3	70
34	male	single	middle and high	unemplyed	no	fully adherent	24	0	0	14	1	22	5	6	5	3	3	70
48	male	married/cohabited	middle and high	unemplyed	no	fully adherent	13	8	0	7	0	21	5	6	4	3	3	60
32	female	married/cohabited	primary and below	unemplyed	no	fully adherent	23	5	0	3	0	24	6	6	6	3	3	60
66	male	married/cohabited	middle and high	unemplyed	no	fully adherent	14	3	0	0	0	20	4	6	4	3	3	60
36	female	married/cohabited	middle and high	unemplyed	yes	not fully adherent	30	19	1	12	1	22	7	5	4	3	3	60
37	female	married/cohabited	middle and high	unemplyed	no	fully adherent	31	7	0	3	0	27	8	7	5	3	4	60
41	female	married/cohabited	middle and high	unemplyed	no	fully adherent	36	6	0	5	0	24	7	6	4	4	3	70
49	female	divorced/separated/widowed	middle and high	emplyed	no	fully adherent	16	3	0	0	0	19	4	5	4	3	3	70
48	female	married/cohabited	primary and below	unemplyed	no	fully adherent	24	4	0	2	0	28	7	7	7	3	4	60
56	male	single	primary and below	unemplyed	no	fully adherent	41	21	1	21	1	26	7	6	5	3	5	60
20	female	single	middle and high	unemplyed	yes	not fully adherent	23	7	0	9	0	29	10	6	6	3	4	70
38	female	married/cohabited	college and above	unemplyed	no	fully adherent		21	1	0	0	25	6	6	5	3	5	50
69	female	married/cohabited	primary and below	unemplyed	no	fully adherent	49	27	1	14	1	23	6	7	4	3	3	60
52	female	married/cohabited	primary and below	unemplyed	no	fully adherent	34	12	1	0	0
46	male	divorced/separated/widowed	primary and below	unemplyed	no	fully adherent	35	9	0	2	0	23	6	6	4	3	4	60
65	male	married/cohabited	middle and high	unemplyed	no	fully adherent	37	0	0	0	0
58	female	married/cohabited	middle and high	unemplyed	no	fully adherent	34	8	0	14	1	33	14	6	5	3	5	60
41	female	divorced/separated/widowed	college and above	emplyed	no	fully adherent	25	1	0	0	0	20	4	6	4	3	3	80
43	male	single	middle and high	emplyed	no	fully adherent	14	0	0	0	0	25	4	11	4	3	3	60
36	male	single	college and above	emplyed	no	fully adherent	29	4	0	3	0	22	4	6	4	3	5	80
50	female	divorced/separated/widowed	middle and high	unemplyed	no	fully adherent	39	24	1	14	1	35	15	7	4	6	3	60
44	female	married/cohabited	middle and high	unemplyed	no	fully adherent	33	25	1	15	1	36	14	12	4	3	3	50
49	female	divorced/separated/widowed	middle and high	unemplyed	no	fully adherent	35	3	0	0	0	36	4	16	4	7	5	40
52	male	married/cohabited	primary and below	unemplyed	no	fully adherent
50	female	single	middle and high	unemplyed	no	fully adherent	14	0	0	0	0	27	11	4	4	5	3	80
48	male	married/cohabited	middle and high	emplyed	no
35	male	single	college and above	emplyed	no	fully adherent	28	18	1	0	0	49	4	15	7	9	14	40
49	female	married/cohabited	middle and high	unemplyed	no	fully adherent	18	0	0	0	0	25	6	9	4	3	3	70
47	female	divorced/separated/widowed	college and above	unemplyed	no	fully adherent	34	8	0	1	0	27	8	9	4	3	3	70
55	male	divorced/separated/widowed	middle and high	emplyed	no	fully adherent	18	0	0	4	0	27	6	11	4	3	3	70
61	male	married/cohabited	middle and high	unemplyed	no	fully adherent	14	2	0	1	0	37	8	7	11	3	8	60
64	male	divorced/separated/widowed	middle and high	unemplyed	no	fully adherent	22	0	0	0	0	29	4	12	4	3	6	60
55	female	married/cohabited	middle and high	unemplyed	no	fully adherent	19
40	female	married/cohabited	middle and high	unemplyed	no	fully adherent	22	5	0	3	0	37	9	11	7	7	3	50
31	male	single	middle and high	unemplyed	no	not fully adherent	22	14	1	7	0	31	4	10	7	3	7	60
64	male	divorced/separated/widowed	middle and high	unemplyed	no	fully adherent	27	1	0	0	0	27	8	9	4	3	3	70
34	male	single	middle and high	unemplyed	no	fully adherent	22	0	0	0	0	24	4	6	8	3	3	60
44	male	single	middle and high	unemplyed	no	fully adherent	38	15	1	10	1	41	13	8	7	3	10	50
40	female	single	middle and high	unemplyed	no	fully adherent	29	7	0	0	0	25	4	11	4	3	3	60
36	female	single	primary and below	unemplyed	no	fully adherent	50	21	1	14	1	38	6	16	7	3	6	50
40	female	single	middle and high	unemplyed	no	fully adherent	46	13	1	5	0	49	4	17	10	8	10	40
46	female	married/cohabited	middle and high	unemplyed	yes	fully adherent	39	6	0	0	0	35	4	15	4	7	5	50
41	male	single	college and above	unemplyed	no	fully adherent	32	8	0	6	0	39	9	14	4	5	7	50
57	female	divorced/separated/widowed	college and above	unemplyed	no	fully adherent	48	10	1	0	0	33	6	15	4	3	5	50
48	male	single	college and above	unemplyed	no	fully adherent	13	2	0	4	0
30	female	single	college and above	unemplyed	no	fully adherent	30	5	0	4	0	22	6	6	4	3	3	80
59	female	married/cohabited	middle and high	emplyed	no	fully adherent	20	3	0	5	0	44	9	13	4	7	11	50
38	female	married/cohabited	middle and high	unemplyed	no	fully adherent	27	19	1	1	0	45	12	12	10	3	8	40
55	female	single	middle and high	unemplyed	no	fully adherent	13	5	0	0	0	29	7	12	4	3	3	60
57	female	divorced/separated/widowed	college and above	unemplyed	no	fully adherent	19	2	0	0	0	25	4	11	4	3	3	60
56	female	divorced/separated/widowed	middle and high	unemplyed	no	fully adherent	25	17	1	14	1	36	8	11	4	3	10	50
39	male	single	middle and high	unemplyed	no	fully adherent	44	21	1	15	1	29	4	13	4	3	5	60
55	female	married/cohabited	primary and below	unemplyed	no	fully adherent	19	13	1	10	1	53	4	23	4	9	13	20
55	female	married/cohabited	middle and high	unemplyed	no	fully adherent	19	0	0	0	0
35	male	married/cohabited	middle and high	unemplyed	no	fully adherent	42	0	0	21	1	59	8	20	9	11	11	20
32	female	single	college and above	unemplyed	no	fully adherent	12	5	0	3	0	42	8	7	12	7	8	60
54	male	married/cohabited	middle and high	unemplyed	no	fully adherent	13	0	0	0	0	22	4	8	4	3	3	70
53	male	married/cohabited	middle and high	unemplyed
70	male	married/cohabited	middle and high	unemplyed	no	fully adherent	39	7	0	1	0	36	14	9	4	6	3	60
65	male	married/cohabited	middle and high	unemplyed	yes	fully adherent	17	16	1	20	1	52	6	23	6	7	10	20
59	female	single	primary and below	unemplyed	no	fully adherent	17	10	1	7	0	42	8	7	9	9	9	60
70	female	married/cohabited	middle and high	unemplyed	no	fully adherent	15	11	1	6	0	41	10	9	9	6	7	60
44	female	divorced/separated/widowed	college and above	unemplyed	no	fully adherent	31	24	1	16	1	36	11	10	4	3	8	50
35	male	single	middle and high	unemplyed	no	not fully adherent		16	1	11	1
42	female	divorced/separated/widowed	middle and high	emplyed	no	fully adherent	25	5	0	4	0	29	8	11	4	3	3	70
33	male	single	middle and high	unemplyed	no	fully adherent	14	4	0	3	0	23	6	7	4	3	3	80
34	male	single	college and above	unemplyed	no	fully adherent	13	0	0	2	0	31	7	12	4	3	5	50
46	male	single	middle and high	unemplyed	no	fully adherent	17	3	0	3	0	38	8	9	8	3	10	50
48	female	divorced/separated/widowed	middle and high	unemplyed	no	fully adherent	35	12	1	3	0
63	male	married/cohabited	primary and below	unemplyed	yes	fully adherent	16	0	0	0	0	33	0	20	0	6	7	20
48	female	divorced/separated/widowed	middle and high	unemplyed	no	fully adherent	36	23	1	20	1	44	18	13	4	6	3
47	female	married/cohabited	middle and high	emplyed	no	fully adherent	12	0	0	0	0	23	4	7	4	3	5	80
51	female	divorced/separated/widowed	middle and high	unemplyed	no	fully adherent	35	12	1	9	0	50	13	6	13	9	9	60
51	female	married/cohabited	middle and high	unemplyed	yes	fully adherent	14	11	1	12	1	30	11	9	4	3	3	60
43	female	married/cohabited	primary and below	unemplyed	no	fully adherent	36	16	1	7	0	27	8	9	4	3	3	70
56	male	married/cohabited	college and above	unemplyed	no	fully adherent	18	0	0	0	0	20	4	6	4	3	3	80
45	female	married/cohabited	middle and high	unemplyed	no	fully adherent	22	22	1	14	1	31	11	7	4	3	6	60
24	male	single	college and above	unemplyed	no	fully adherent	21	27	1	21	1	31	4	15	4	3	5	50
18	male	single	primary and below	unemplyed	no	fully adherent	33	0	0	14	1	51	4	19	10	9	9	10
34	female	married/cohabited	middle and high	unemplyed	no	not fully adherent	28	16	1	12	1	50	11	10	10	7	12	70
58	female	divorced/separated/widowed	primary and below	unemplyed	no	fully adherent	33	13	1	14	1	53	11	9	13	11	9	60
69	female	divorced/separated/widowed	middle and high	unemplyed	yes	fully adherent	20	12	1	7	0	27	13	4	4	3	3	70
65	male	single	primary and below	unemplyed	no	fully adherent	26	7	0	0	0	35	6	7	9	5	8	60
51	male	single	middle and high	unemplyed	no	fully adherent	26	14	1	6	0	39	11	7	10	6	5	60
40	male	single	middle and high	unemplyed	no	fully adherent	21	0	0	7	0	36	9	6	7	7	7	70
36	male	single	middle and high	unemplyed	no	fully adherent	37	17	1	14	1	67	18	9	16	10	14	60
47	male	single	middle and high	unemplyed	no	fully adherent	33	16	1	6	0	48	10	8	12	6	12	60
48	male	married/cohabited	middle and high	unemplyed	no	fully adherent	16	23	1	12	1	30	6	12	4	5	3	60
45	male	married/cohabited	primary and below	unemplyed	no	fully adherent	28	23	1	17	1	54	14	8	14	7	11	50
55	female	divorced/separated/widowed	middle and high	unemplyed	no	fully adherent	18	0	0	0	0	27	6	5	6	3	7	70
36	female	single	college and above	unemplyed	no	fully adherent	27	15	1	11	1	46	14	5	9	7	11	70
36	female	divorced/separated/widowed	college and above	unemplyed	no	fully adherent	35	0	0	0	0	22	4	8	4	3	3	70
56	female	married/cohabited	middle and high	unemplyed	no	fully adherent	13	2	0	2	0	24	4	8	4	5	3	80
44	female	married/cohabited	middle and high	unemplyed	yes	fully adherent	30	21	1			26	9	6	4	3	4	70
45	female	married/cohabited	middle and high	unemplyed	no	fully adherent	22	6	0	3	0	21	4	7	4	3	3	80
37	female	married/cohabited	college and above	emplyed	no	fully adherent	25	12	1	0	0	23	9	4	4	3	3	80
33	female	married/cohabited	middle and high	unemplyed	no	fully adherent	29	19	1	14	1
41	male	single	middle and high	unemplyed	no	fully adherent	25	11	1	13	1	35	11	10	4	4	6	50
55	female	divorced/separated/widowed	middle and high	unemplyed	no	fully adherent	14	0	0	0	0	25	4	11	4	3	3	70
18	male	single	primary and below	unemplyed	no	fully adherent	21	9	0	6	0	33	6	13	0	7	7	10
56	female	married/cohabited	primary and below	unemplyed	no	not fully adherent	19	8	0	9	0	34	12	6	4	3	9	40
49	male	married/cohabited	middle and high	emplyed	yes	fully adherent		9	0	2	0	21	5	6	4	3	3	80
64	male	divorced/separated/widowed	middle and high	unemplyed	no	fully adherent	48	19	1	17	1	38	19	6	4	6	3	50
36	female	single	middle and high	unemplyed	yes	fully adherent	24	8	0	4	0	27	10	6	4	4	3	70
70	female	married/cohabited	primary and below	unemplyed	no	fully adherent	35	4	0	0	0	23	4	6	6	3	4	50
49	male	divorced/separated/widowed	middle and high	unemplyed	no	not fully adherent	29	9	0	0	0	21	4	6	4	3	4	60
65	male	single	primary and below	unemplyed	no	fully adherent	16	27	1	21	1
44	male	single	primary and below	unemplyed	no	fully adherent	20	13	1	7	0	26	9	6	4	3	4	60
55	female	married/cohabited	middle and high	unemplyed	no	fully adherent	14	10	1	11	1	27	8	6	6	3	4	70
45	male	married/cohabited	primary and below	emplyed	no	fully adherent	19	0	0	0	0
35	female	married/cohabited	middle and high	unemplyed	no	fully adherent	24	11	1	5	0	24	8	6	4	3	3	60
55	male	married/cohabited	primary and below	unemplyed	no	fully adherent	23	10	1	7	0	23	7	6	4	3	3	60
38	male	single	primary and below	emplyed	no	fully adherent	16	0	0	1	0	19	4	5	4	3	3	70
28	female	married/cohabited	middle and high	unemplyed	yes	fully adherent	17	9	0	6	0	22	5	5	5	3	4	60
47	female	married/cohabited	primary and below	unemplyed	no	fully adherent	14	1	0	0	0	20	4	6	4	3	3	60
34	female	married/cohabited	middle and high	unemplyed	no	fully adherent	30	0	0	0	0	20	5	5	4	3	3	70
38	male	single	middle and high	unemplyed	no	fully adherent	15	4	0	4	0	22	6	6	4	3	3	60
30	female	married/cohabited	middle and high	unemplyed	no	fully adherent	16	5	0	3	0	32	8	6	9	3	6	60
38	female	married/cohabited	primary and below	unemplyed	no	fully adherent	21	7	0	7	0	30	8	6	7	4	5	60
47	female	married/cohabited	middle and high	unemplyed	no	fully adherent	60	14	1	20	1	30	9	6	6	5	4	60
50	male	divorced/separated/widowed	middle and high	unemplyed	no	not fully adherent	25	9	0	3	0	23	6	6	4	3	4	60
60	male	single	college and above	unemplyed	no	fully adherent	13	1	0	1	0	19	4	5	4	3	3	80
59	female	married/cohabited	middle and high	unemplyed	no	fully adherent	20	2	0	1	0	24	7	7	4	3	3	80
48	male	divorced/separated/widowed	middle and high	unemplyed	yes	not fully adherent	54	23	1	21	1	68	13	11	19	11	14	40
28	female	single	middle and high	unemplyed	no	not fully adherent	41	16	1	12	1	39	8	14	8	6	3	40
55	female	married/cohabited	middle and high	unemplyed	no	fully adherent	28	14	1	15	1	34	10	6	10	4	4	60
41	male	divorced/separated/widowed	primary and below	unemplyed	no	fully adherent	37	13	1	7	0	37	10	8	7	6	6	60
41	male	divorced/separated/widowed	college and above	unemplyed	no	fully adherent	21	17	1	6	0
63	female	divorced/separated/widowed	middle and high	unemplyed	no	fully adherent	23	20	1	19	1	33	15	4	4	7	3	60
35	female	single	middle and high	unemplyed	yes	fully adherent	46	17	1	16	1	67	12	13	20	13	9	30
54	female	divorced/separated/widowed	middle and high	unemplyed	no	fully adherent	12	14	1	7	0	30	10	8	4	5	3	70
54	male	divorced/separated/widowed	middle and high	unemplyed	no	fully adherent	24	18	1	14	1	30	10	6	5	6	3	70
59	male	married/cohabited	middle and high	unemplyed	no	fully adherent	32	8	0	7	0	34	7	5	12	3	7	50
34	male	single	middle and high	unemplyed	no	fully adherent	17	2	0	2	0
50	female	single	middle and high	unemplyed	no	fully adherent	19	19	1	5	0	33	13	7	5	5	3	80
57	male	divorced/separated/widowed	middle and high	unemplyed	no	fully adherent	37	25	1	17	1	45	12	11	13	4	5	60
65	male	married/cohabited	middle and high	unemplyed	no	fully adherent	34	5	0	0	0	26	6	7	4	4	5	80
41	female	married/cohabited	middle and high	unemplyed	no	fully adherent	18	10	1	6	0	28	9	6	5	5	3	70
41	female	divorced/separated/widowed	middle and high	unemplyed	no	fully adherent	37	14	1	16	1	49	17	7	9	7	9	40
54	male	divorced/separated/widowed	college and above	emplyed	no	fully adherent	12	0	0	0	0	23	7	5	4	4	3	80
48	female	married/cohabited	middle and high	unemplyed	no	fully adherent	27	6	0	6	0	23	6	7	4	3	3	80
67	female	divorced/separated/widowed	middle and high	unemplyed	no	fully adherent	26	9	0	7	0	29	7	4	7	5	6	70
47	female	single	middle and high	unemplyed	no	fully adherent	44	7	0	2	0	35	7	12	6	7	3	70
44	male	single	middle and high	unemplyed	no	fully adherent	23	5	0	4	0	36	10	10	7	3	6	60
51	female	married/cohabited	middle and high	unemplyed	no	not fully adherent	45	18	1	14	1	43	12	7	11	6	7	50
36	female	single	college and above	unemplyed	no	fully adherent	34	15	1	21	1	41	19	6	6	7	3	60
41	female	single	middle and high	emplyed	no	fully adherent	14	0	0	0	0	18	4	4	4	3	3	90
56	female	single	middle and high	unemplyed	no	not fully adherent	17	3	0	0	0	34	10	9	4	5	6	70
54	female	divorced/separated/widowed	middle and high	unemplyed	no	fully adherent	23	16	1	7	0	23	8	5	4	3	3	80
47	female	married/cohabited	middle and high	unemplyed	no	not fully adherent	25	11	1	10	1	25	8	7	4	3	3
43	male	single	middle and high	unemplyed	no	fully adherent	23	9	0	7	0	39	10	9	11	4	5	70
49	male	divorced/separated/widowed	college and above	unemplyed	no	fully adherent	27	20	1	16	1	45	13	8	12	4	8	60
42	female	divorced/separated/widowed	middle and high	unemplyed	no	fully adherent	23	11	1	4	0	51	8	11	14	9	9	60
48	male	single	middle and high	emplyed	no	fully adherent	21	5	0	2	0	24	6	8	4	3	3	70
63	male	married/cohabited	middle and high	unemplyed	no	fully adherent	13	2	0	0	0	19	5	4	4	3	3	80
57	male	divorced/separated/widowed	middle and high	unemplyed	no	fully adherent	25	8	0	3	0	34	7	8	7	5	7	60
39	male	single	middle and high	unemplyed	no	not fully adherent	42	20	1	7	0	69	18	13	15	8	15	30
51	female	single	college and above	unemplyed	no	fully adherent	33	6	0	7	0	23	7	6	4	3	3	80
49	female	single	primary and below	unemplyed	no	fully adherent	17	23	1	7	0	35	8	13	7	3	4	60
41	male	single	middle and high	unemplyed	no	fully adherent	27	6	0	14	1	41	10	11	8	6	6	60
37	male	single	primary and below	unemplyed	no	fully adherent	24	19	1	16	1	42	11	11	9	4	7	50
51	female	divorced/separated/widowed	middle and high	unemplyed	no	fully adherent	29	3	0	0	0	33	4	13	7	6	3	70
46	female	married/cohabited	middle and high	unemplyed	no	fully adherent	20	8	0	7	0	25	7	6	5	4	3	80
39	female	married/cohabited	middle and high	unemplyed	no		12	0	0	0	0	21	5	4	6	3	3	80
61	female	married/cohabited	middle and high	unemplyed	no	fully adherent	24	6	0	7	0	30	7	11	6	3	3	70
49	male	single	middle and high	unemplyed	no	fully adherent	41	22	1	21	1	36	10	5	10	3	8	60
59	male	married/cohabited	middle and high	unemplyed	yes	fully adherent	28	13	1	9	0	31	10	7	5	6	3	80
48	male	married/cohabited	middle and high	unemplyed	no	fully adherent	15	16	1	17	1	32	12	8	4	5	3	70
36	male	single	college and above	unemplyed	no	fully adherent	20	24	1	20	1	28	7	7	8	3	3	70
52	male	single	middle and high	unemplyed	no	fully adherent		9	0	12	1	33	5	13	5	6	4	50
37	female	single	primary and below	unemplyed	no	fully adherent	48	5	0	0	0	36	4	16	7	3	6	60
56	male	married/cohabited	primary and below	unemplyed	no	fully adherent	33	13	1	3	0	34	10	8	4	5	7	70
35	female	married/cohabited	middle and high	unemplyed	no	fully adherent	17	0	0	4	0	24	4	10	4	3	3	80
70	female	married/cohabited	primary and below	unemplyed	no	fully adherent	14	0	0	0	0	20	4	6	4	3	3	60
61	female	married/cohabited	primary and below	emplyed	no	fully adherent	42	9	0	13	1	52	14	10	13	8	7	40
24	male	single	middle and high	unemplyed	no	fully adherent	18	0	0	0	0	19	4	5	4	3	3	60
40	male	married/cohabited	middle and high	emplyed	no	not fully adherent	25	5	0	7	0	24	5	6	7	3	3	70
48	female	married/cohabited	middle and high	unemplyed	no	fully adherent	23	7	0	13	1	28	7	6	7	3	5	60
32	male	single	college and above	unemplyed	no	fully adherent	53	24	1	20	1	56	12	10	15	7	12	50
38	male	single	middle and high	unemplyed	no	fully adherent	16	3	0	0	0	22	6	6	4	3	3	70
70	male	married/cohabited	primary and below	unemplyed	no	fully adherent	16	3	0	0	0	20	4	6	4	3	3	60
66	male	married/cohabited	middle and high	unemplyed	no	fully adherent	26	1	0	0	0	22	4	6	5	3	4	60
58	male	single	middle and high	unemplyed	no	fully adherent	16	0	0	0	0	20	4	6	4	3	3	60
38	female	married/cohabited	middle and high	unemplyed	no	fully adherent	12	11	1	0	0	21	5	6	4	3	3	60
43	female	divorced/separated/widowed	middle and high	unemplyed	no	fully adherent	29	14	1	8	0	28	7	6	6	3	6	60
32	male	single	middle and high	unemplyed	yes	fully adherent	39	16	1	16	1	24	6	6	5	3	4	60
31	female	married/cohabited	college and above	unemplyed	no	fully adherent	32	5	0	0	0	34	5	16	6	3	4	60
56	male	married/cohabited	middle and high	unemplyed	no	fully adherent	12	8	0	0	0	38	8	10	5	6	9	80
32	female	single	middle and high	unemplyed	no	fully adherent	13	3	0	1	0	20	4	6	4	3	3	60
42	male	married/cohabited	primary and below	emplyed	no	fully adherent	12	0	0	0	0	20	4	6	4	3	3	70
48	male	single	middle and high	emplyed	yes	fully adherent	17	5	0	5	0	21	5	6	4	3	3	70
59	male	divorced/separated/widowed	middle and high	unemplyed	no	fully adherent	21	2	0	0	0	20	4	6	4	3	3	60
59	female	married/cohabited	primary and below	unemplyed	yes	fully adherent	32	12	1	7	0	37	13	6	10	3	5	50
48	male	single	middle and high	unemplyed	no	fully adherent	16	7	0	4	0	21	5	6	4	3	3	60
54	female	married/cohabited	middle and high	unemplyed	no	fully adherent	36	0	0	0	0	20	4	6	4	3	3	60
56	female	married/cohabited	college and above	emplyed	no	fully adherent	18	1	0	0	0	18	4	4	4	3	3
70	male	single	primary and below	unemplyed	yes	fully adherent	29	27	1	14	1	30	10	6	8	3	3	40
55	female	divorced/separated/widowed	middle and high	unemplyed	no	fully adherent	47
70	female	single	middle and high	unemplyed	no	not fully adherent	31	4	0	3	0	21	5	6	4	3	3	60
43	male	single	primary and below	unemplyed	no	fully adherent	30	1	0	0	0	22	5	6	4	3	4	60
30	female	single	middle and high	unemplyed	no	fully adherent	48			10	1	25	4	8	5	3	5	50
63	female	divorced/separated/widowed	middle and high	unemplyed	no	fully adherent	33	12	1	13	1
49	male	married/cohabited	middle and high	unemplyed	no	fully adherent	13	6	0	3	0	26	9	7	4	3	3	80
63	male	divorced/separated/widowed	middle and high	unemplyed	no	fully adherent	20	4	0	2	0	26	10	6	4	3	3	80
55	female	married/cohabited	middle and high	unemplyed	no	fully adherent	28	20	1	18	1	42	11	7	8	9	7	50
40	female	single	middle and high	unemplyed	no	fully adherent	26	8	0	7	0	21	4	6	4	3	4	60
57	male	divorced/separated/widowed	middle and high	unemplyed	yes	fully adherent	37	16	1	21	1	30	12	7	4	3	4	50
33	male	single	middle and high	unemplyed	no	fully adherent	42	19	1	21	1	30	8	6	7	3	6	50
55	male	divorced/separated/widowed	middle and high	unemplyed	yes	fully adherent	34	14	1	8	0	47	14	7	12	5	9	60
48	male	single	middle and high	unemplyed	no	fully adherent	24	8	0	6	0	38	10	7	10	4	7	60
46	female	single	middle and high	unemplyed	no	fully adherent	29	6	0	7	0	34	10	6	4	9	5	70
35	female	single	college and above	unemplyed	no	fully adherent	26	27	1	14	1	45	17	4	6	7	11	70
46	male	single	college and above	unemplyed	no	not fully adherent	36	6	0	4	0	40	8	10	14	5	3	60
65	male	divorced/separated/widowed	primary and below	unemplyed	no	fully adherent	39	20	1	21	1	40	14	7	6	6	7	60
56	male	single	middle and high	unemplyed	yes	fully adherent	38	21	1	14	1	72	19	12	18	14	9	40
42	male	single	middle and high	unemplyed	no	fully adherent	19	1	0	3	0	21	6	5	4	3	3	80
61	female	divorced/separated/widowed	middle and high	unemplyed	no	fully adherent	16	11	1	19	1	29	11	6	4	4	4	80
41	male	single	primary and below	unemplyed	no	fully adherent	22	3	0	0	0	22	4	6	5	3	4	60
35	male	divorced/separated/widowed	primary and below	unemplyed	no	fully adherent	19	5	0	2	0	32	10	8	5	6	3	70
67	male	married/cohabited	middle and high	unemplyed	no	fully adherent	20	6	0	7	0	28	8	10	4	3	3	70
62	male	single	primary and below	unemplyed	no	fully adherent	33	8	0	7	0	44	10	12	9	7	6	50
59	female	married/cohabited	middle and high	unemplyed	yes	fully adherent	22	1	0	5	0	37	8	4	11	7	7	70
46	male	single	primary and below	unemplyed	no	fully adherent	20	2	0	0	0	46	4	16	10	6	10	30
